# Supplementary figures and images for: Bee Bread as a Functional Product: Phenolic Compounds, Amino Acid, Sugar, and Organic Acid Profiles
Source: MDPI journal article supplement (doi:10.3390/foods13050795), 2024-03-04

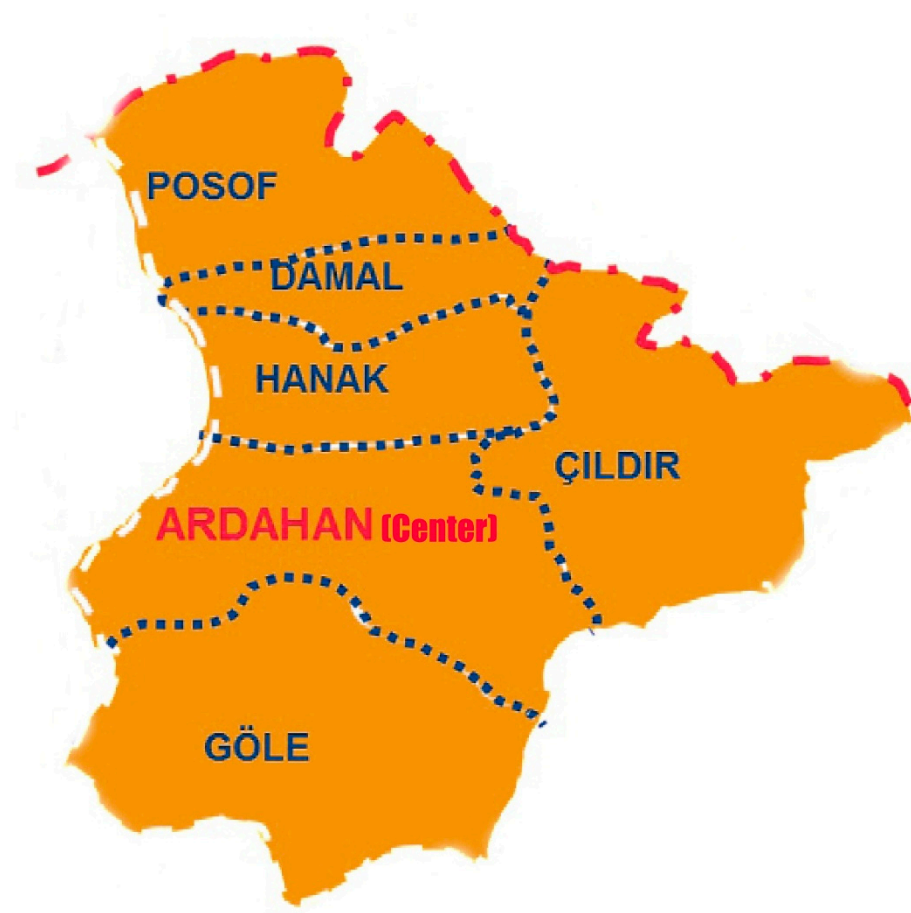

**Figure S1.** Districts of Ardahan.

Supplement: s1 [file s1]
